# Supplementary material
Source: PubMed Central journal article supplement (PMC5623658)

# Supplementary Figure 3

*NvfosB-like* Cp\_0hpf: 33.01

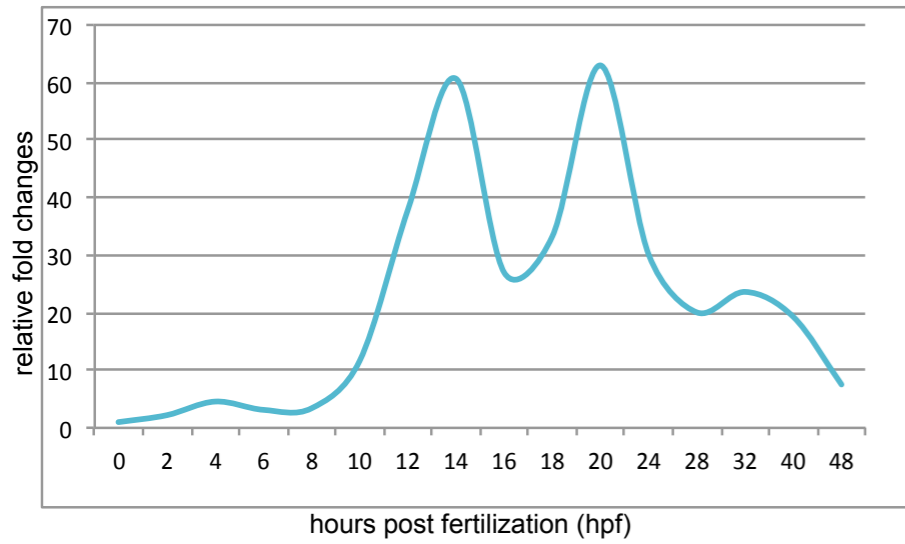

*Nvhes-like2* Cp\_0hpf: 33.44

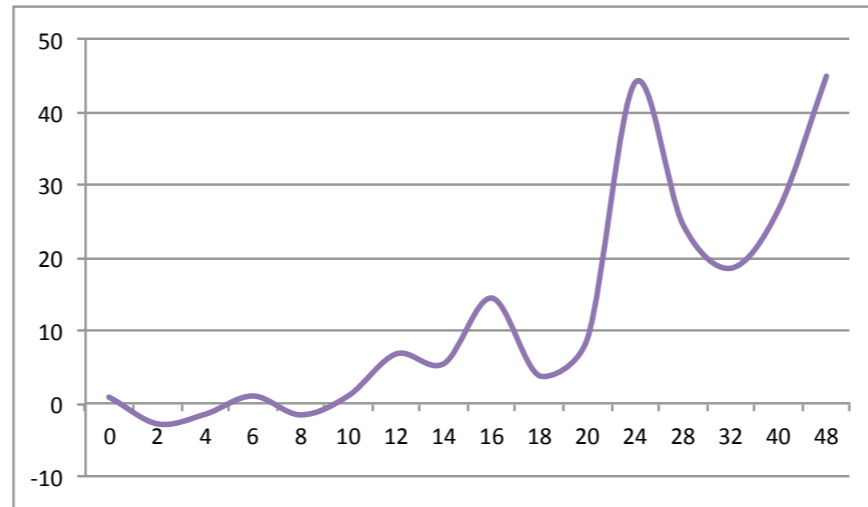

*Nvmusk-like* Cp\_0hpf: 32.31

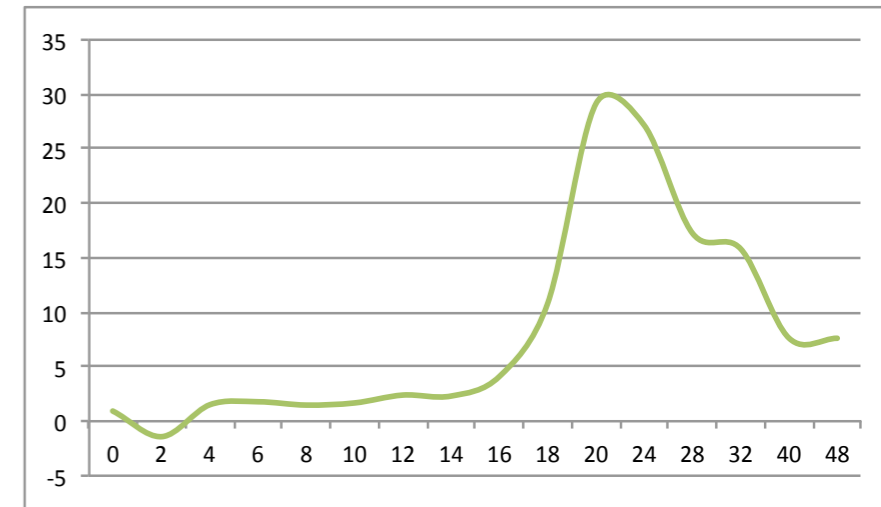

*Nvsix45* Cp\_0hpf: 40.00

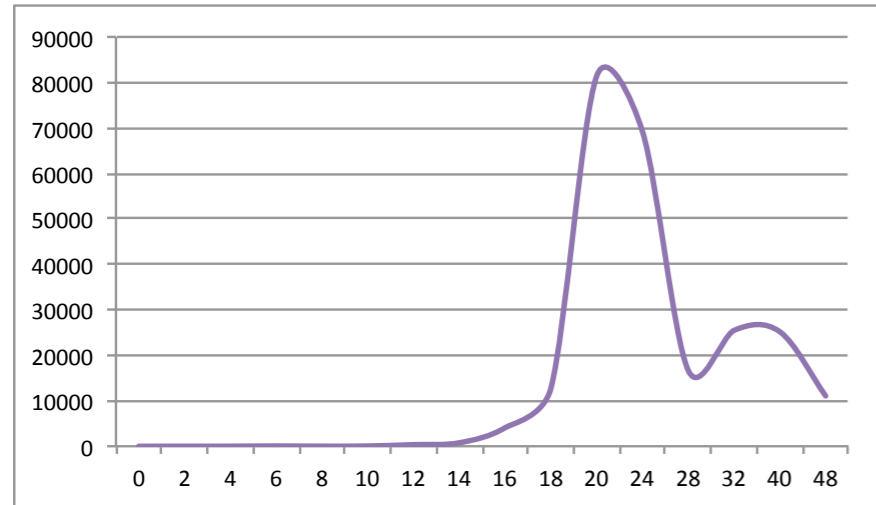

*NveHand-like* Cp\_0hpf: 34.53

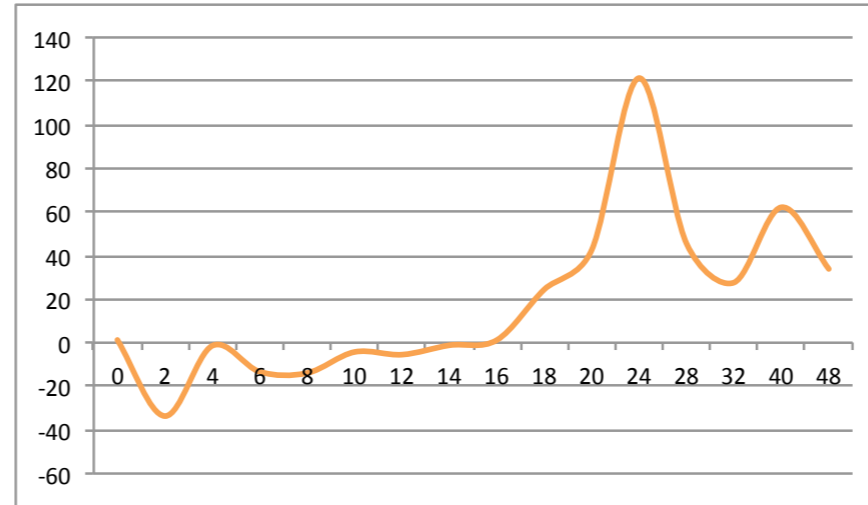

*Nvpdgfr-like* Cp\_0hpf: 35.47

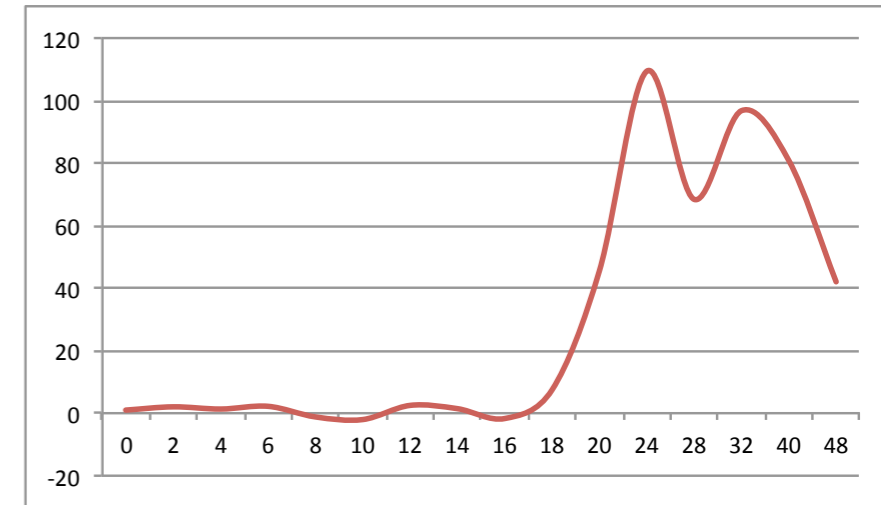

*Nvmae-like* Cp\_0hpf: 34.56

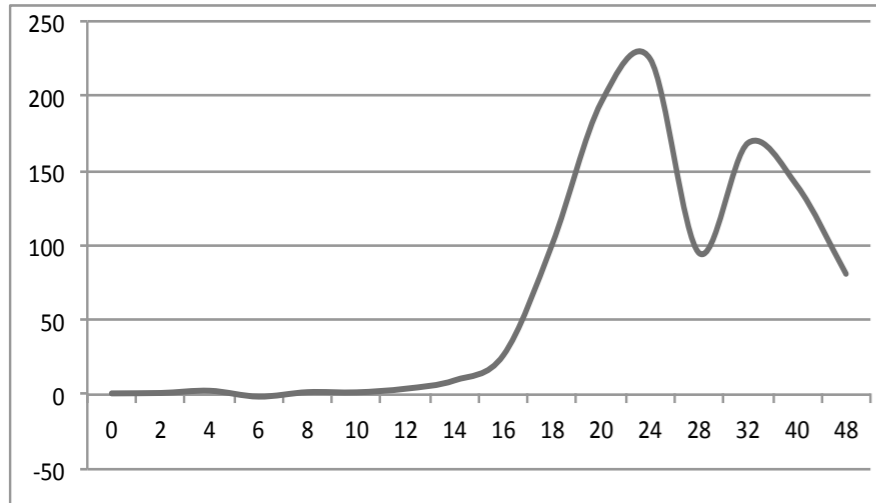

*Nvtbx20-like2* Cp\_0hpf: 40.00

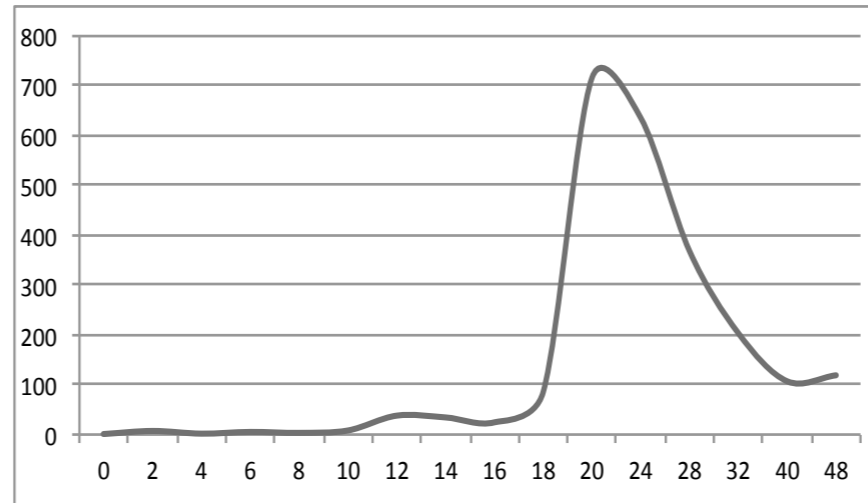

*Nvfz1-like* Cp\_0hpf: 37.41

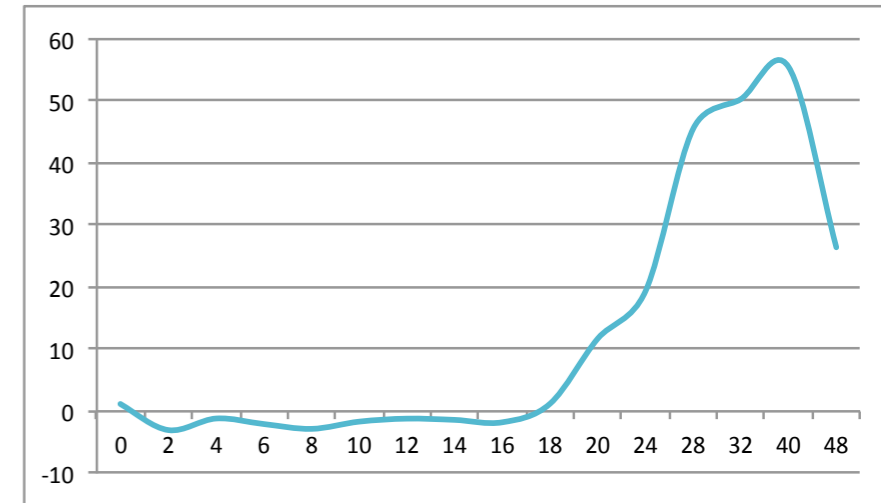

*Nvgata* Cp\_0hpf: 34.77

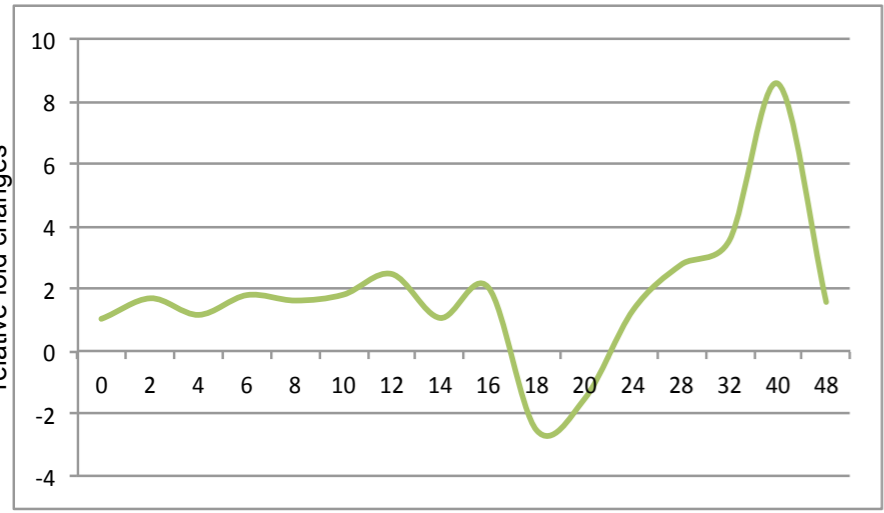

hours post fertilization (hpf)

*Nvkielin-like* Cp\_0hpf: 39.14

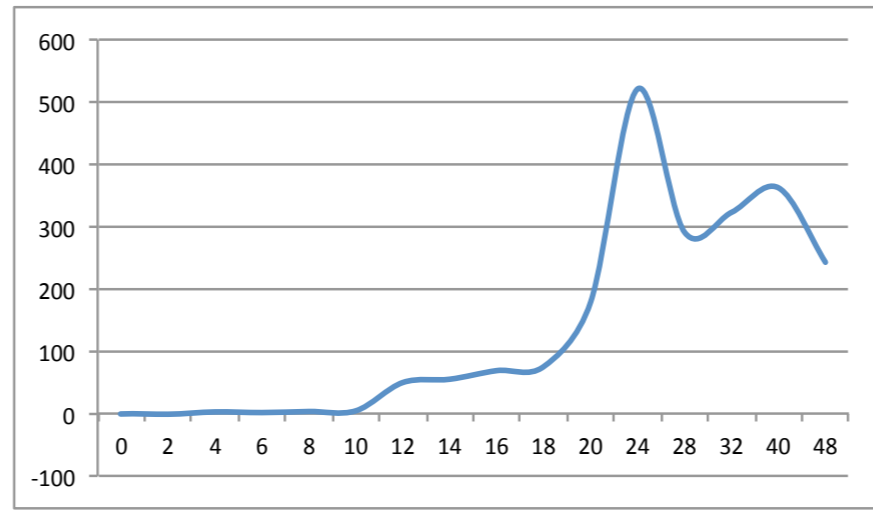

*Nvmeis* Cp\_0hpf: 36.79

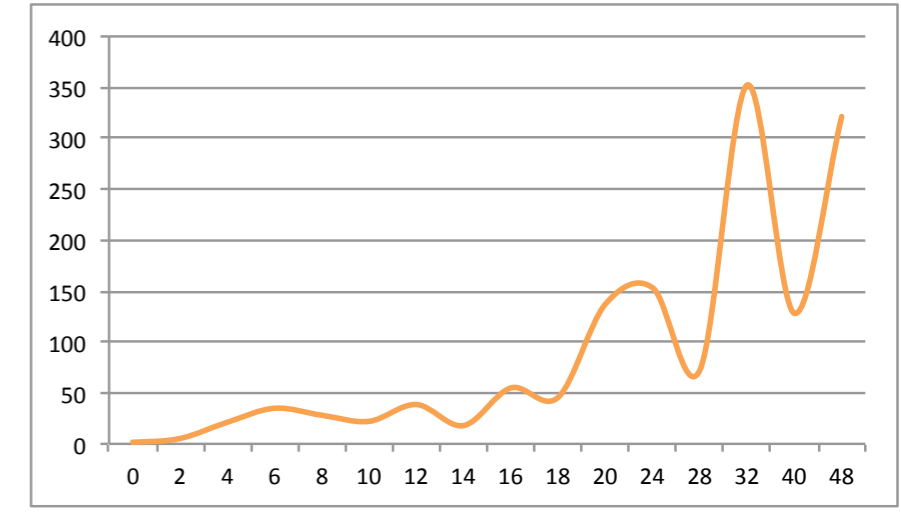

*Nvpou-like1* Cp\_0hpf: 33.82

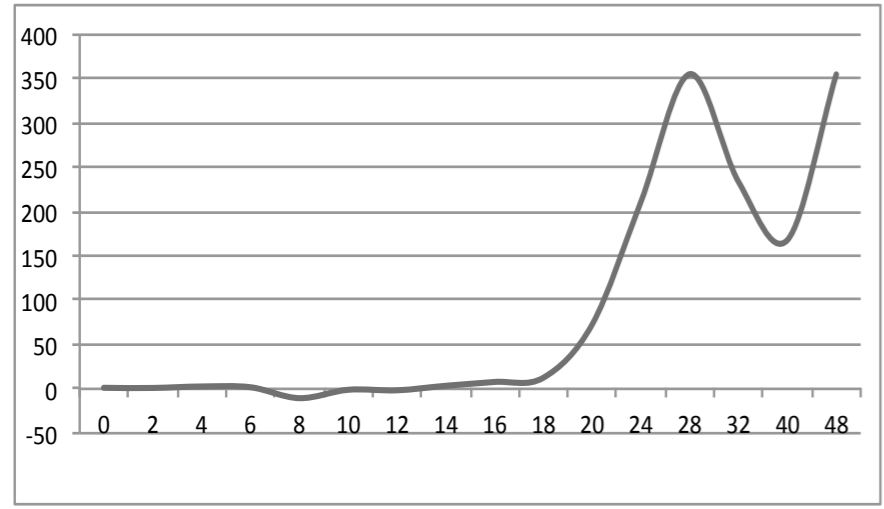

*Nvpou-like2* Cp\_0hpf: 35.07

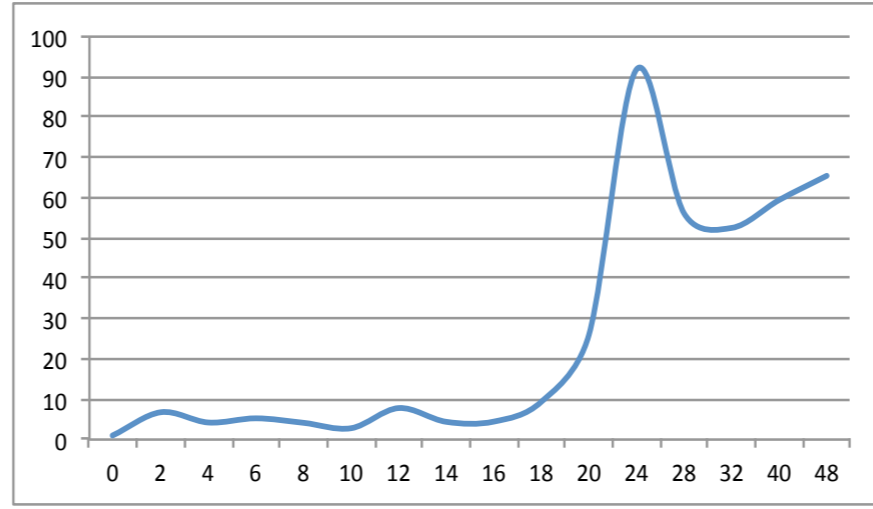

*Nvrunt* Cp\_0hpf: 38.91

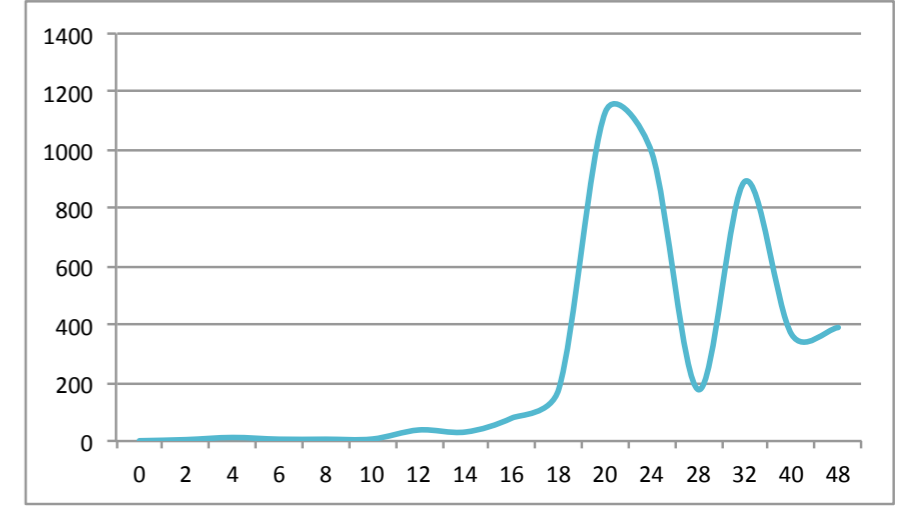

*Nvbmp1-like* Cp\_0hpf: 35.18

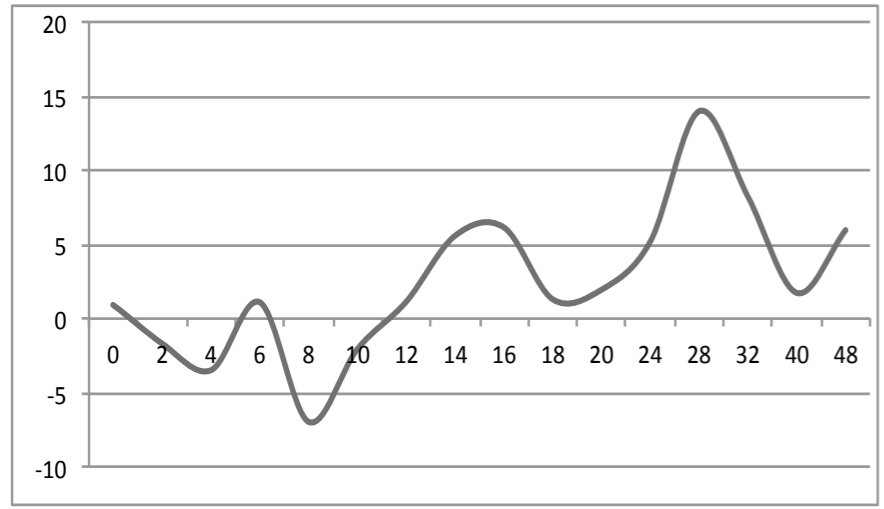

*Nvfgfr-like* Cp\_0hpf: 35.56

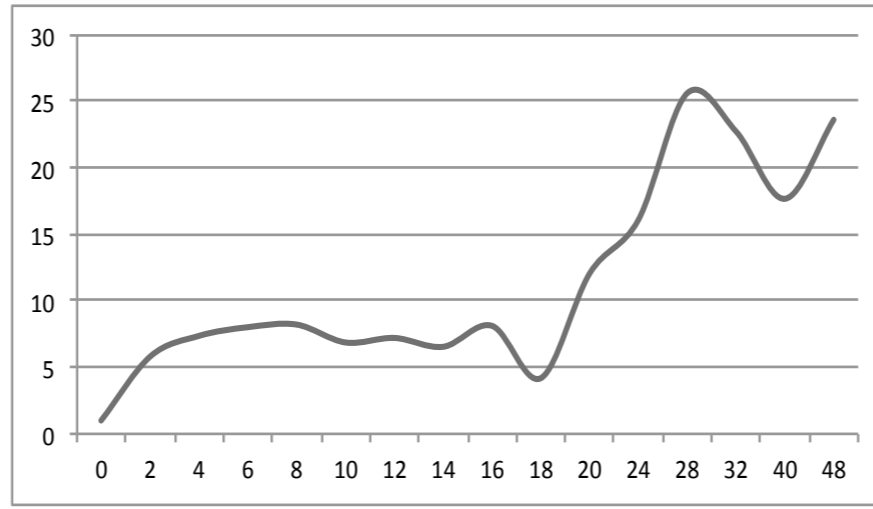

*Nvfox1* Cp\_0hpf: 40.00

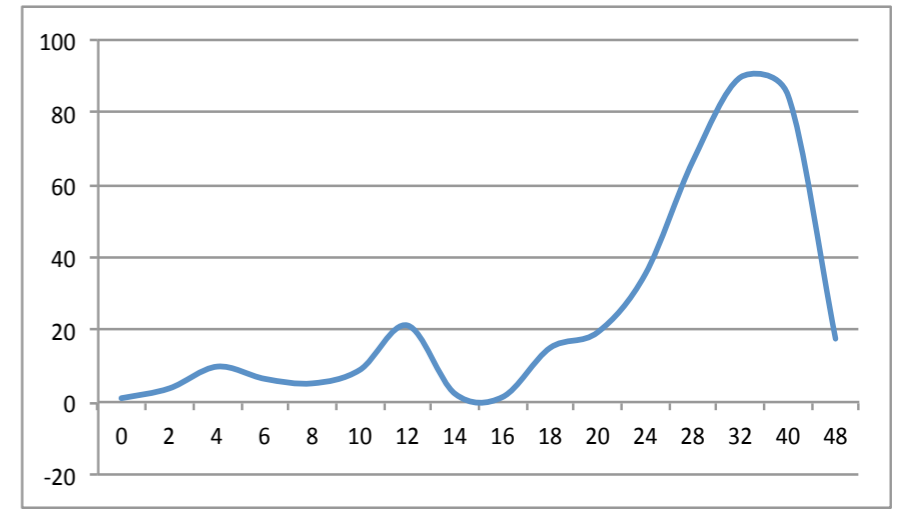

*Nvhd058*

Cp\_0hpf: 33.62

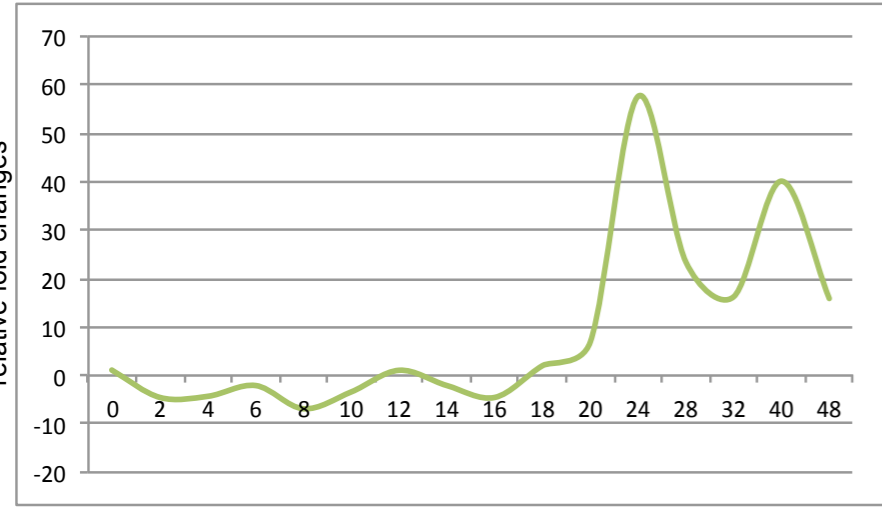

hours post fertilization (hpf)

*Nvk50-5*

Cp\_0hpf: 35.74

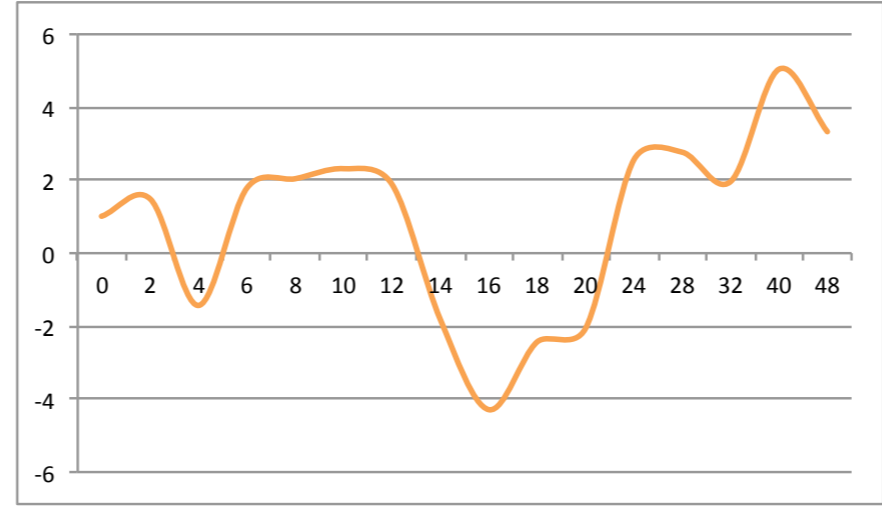

*Nvperlecan-like*

Cp\_0hpf: 35.29

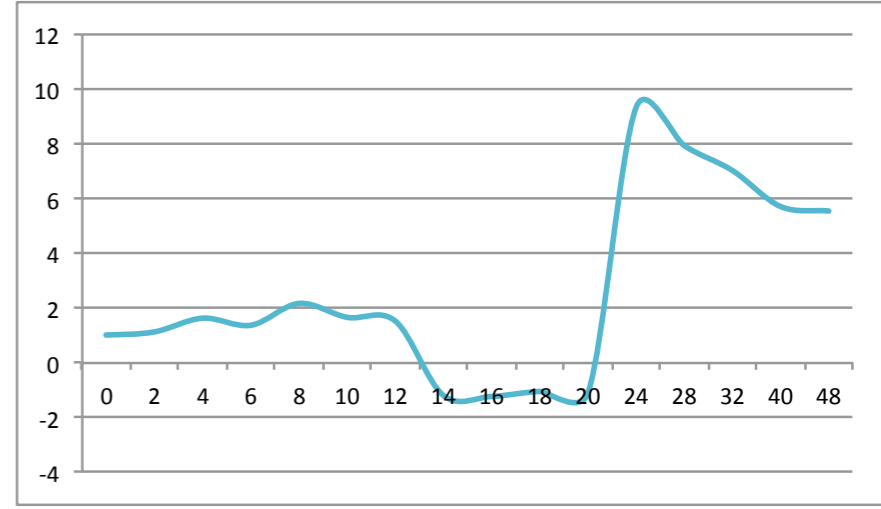

*Nvtbx1-like*

Cp\_0hpf: 40.00

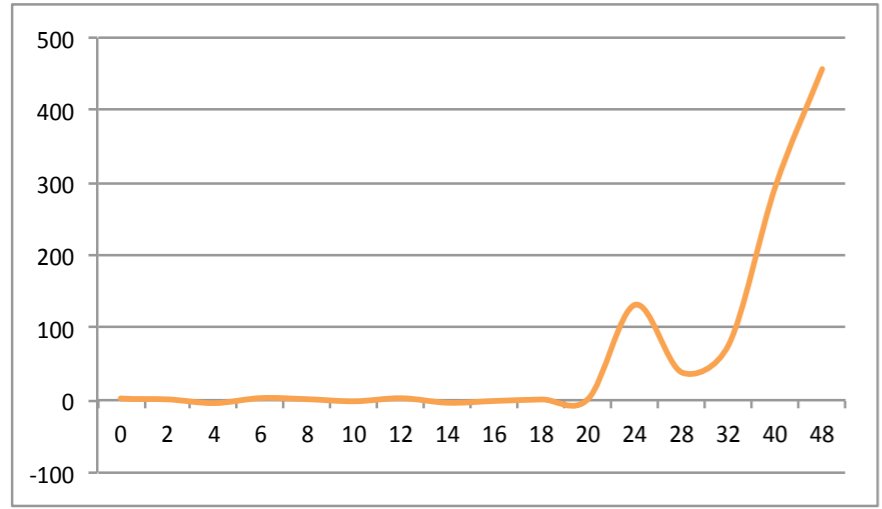

*Nvret-like2*

Cp\_0hpf: 24.51

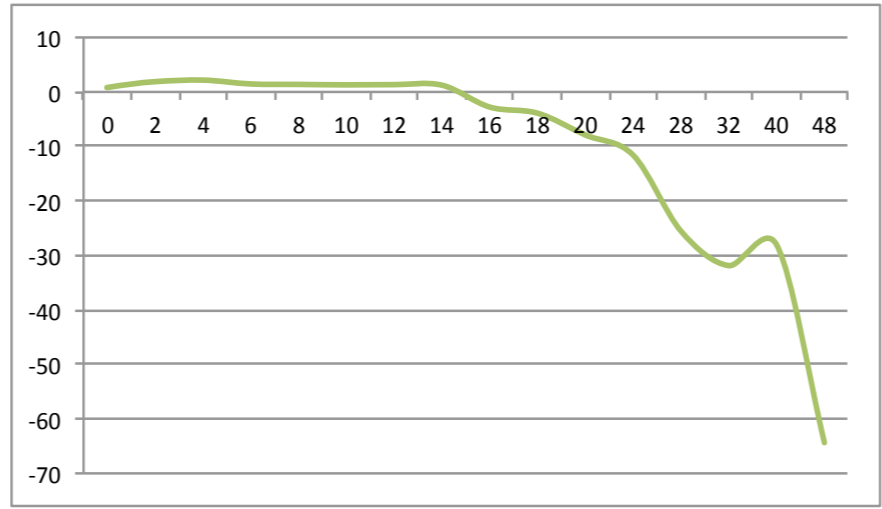

# Figure S2 - (C) Ectodermal Genes

*Nvlhx6* Cp\_0hpf: 37.87

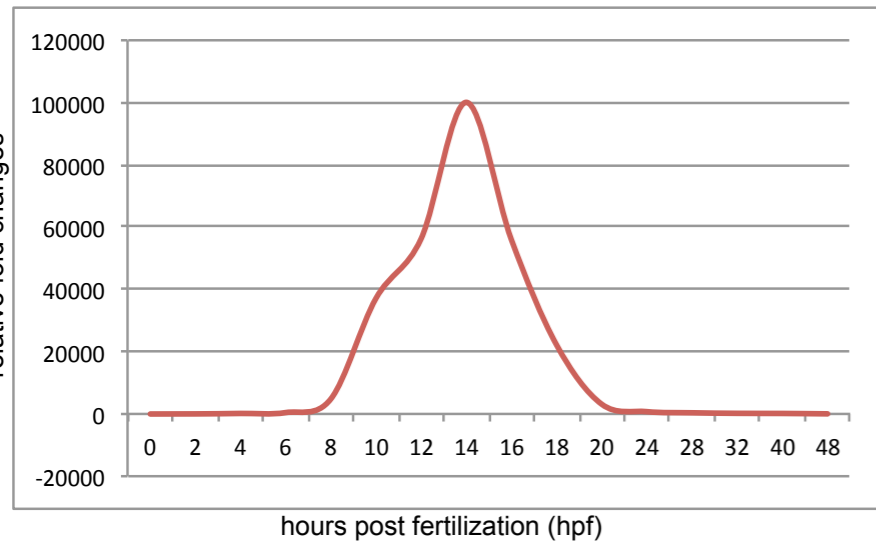

*Nvsp8/9-like* Cp\_0hpf: 36.96

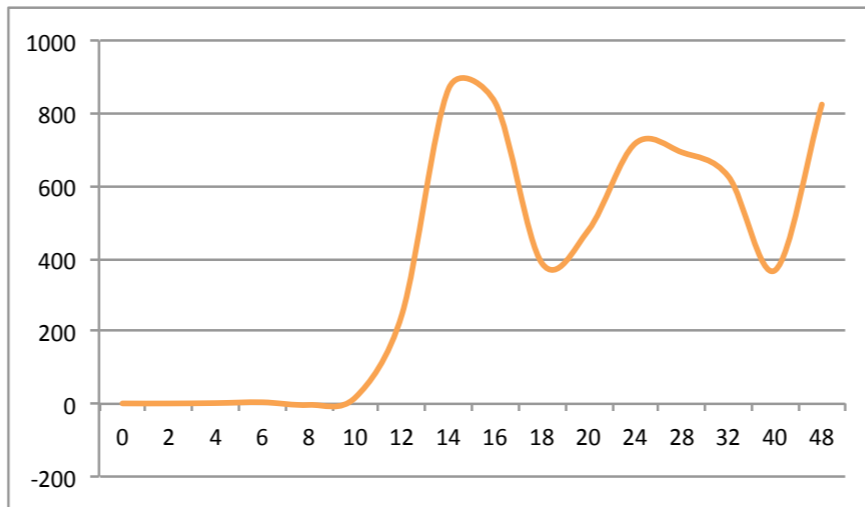

*NvfgfA1* Cp\_0hpf: 40.00

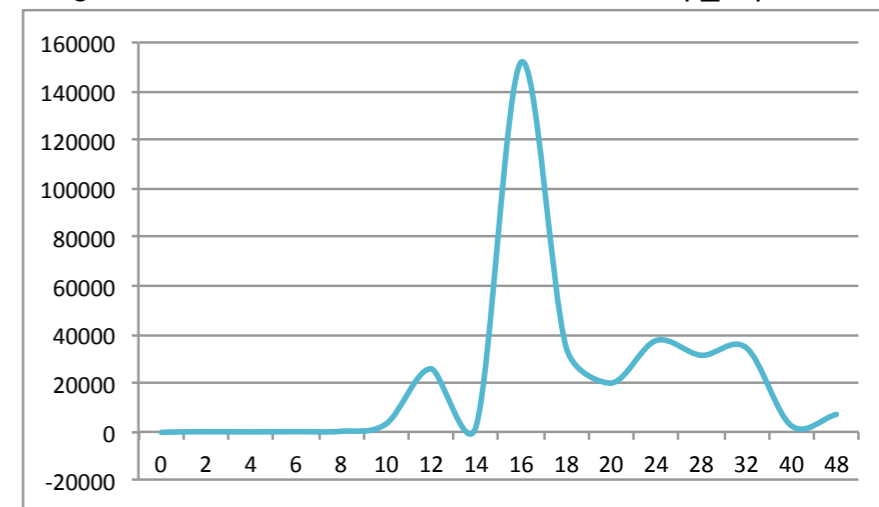

*NvfgfrA* Cp\_0hpf: 40.00

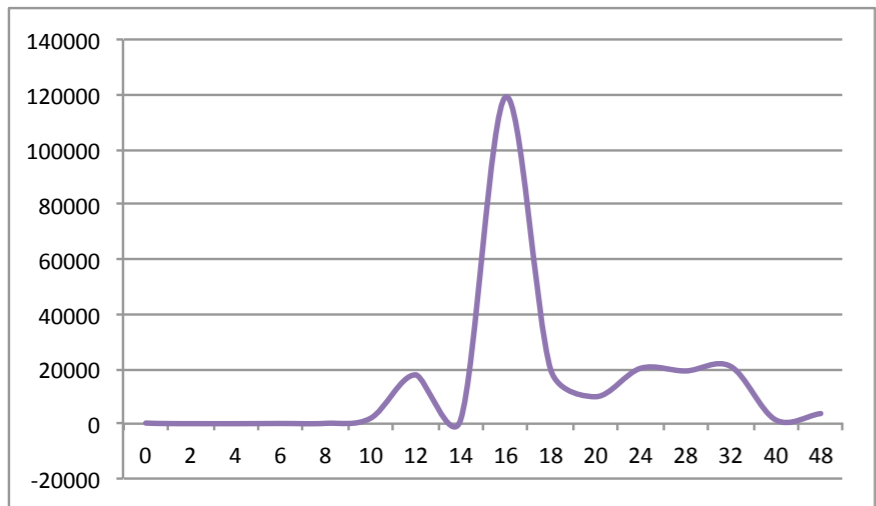

*Nvax1* Cp\_0hpf: 31.67

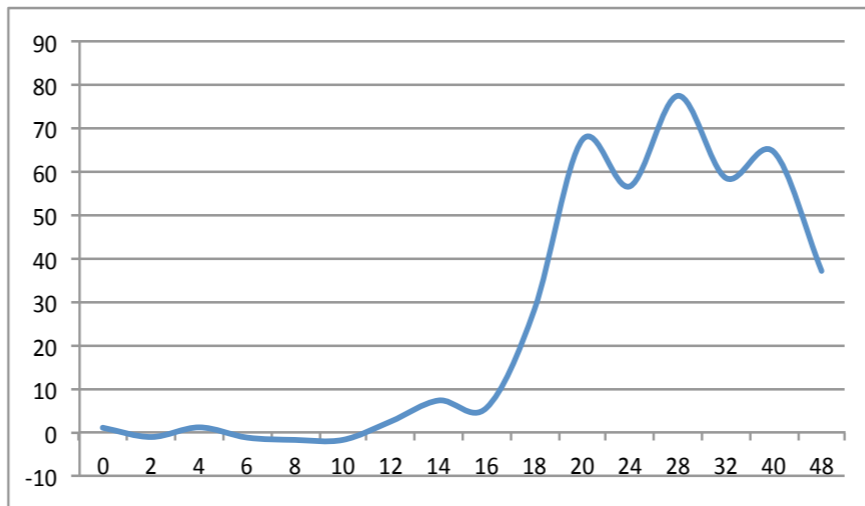

*Nvfoxq2* Cp\_0hpf: 30.07

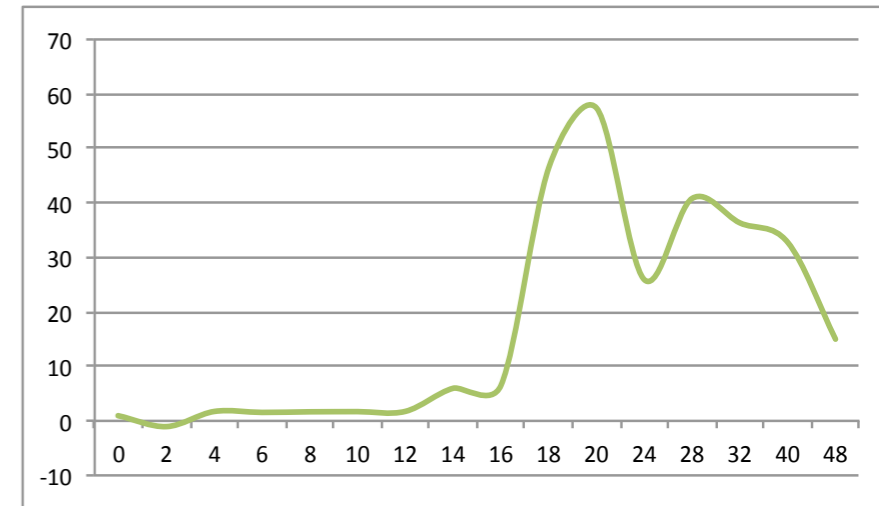

*Nvhmx3* Cp\_0hpf: 40.00

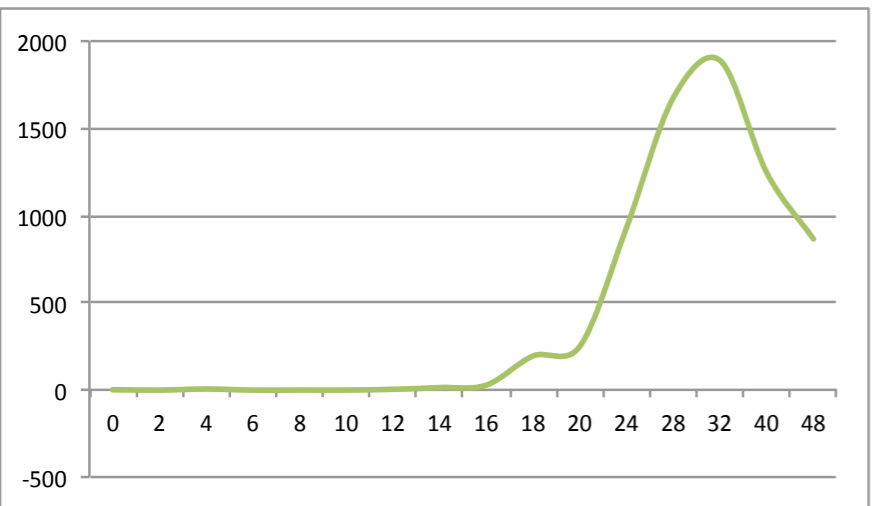

*NvfgfA2* Cp\_0hpf: 27.55

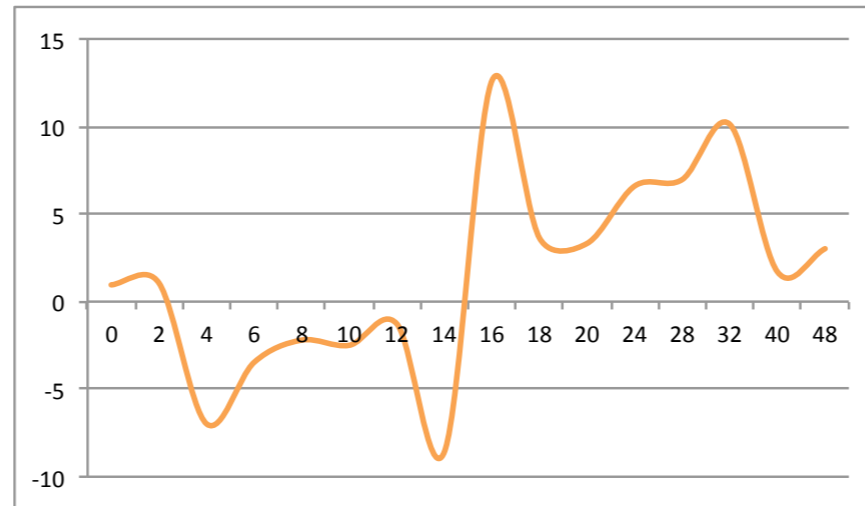

*Nvr3-like* Cp\_0hpf: 32.22

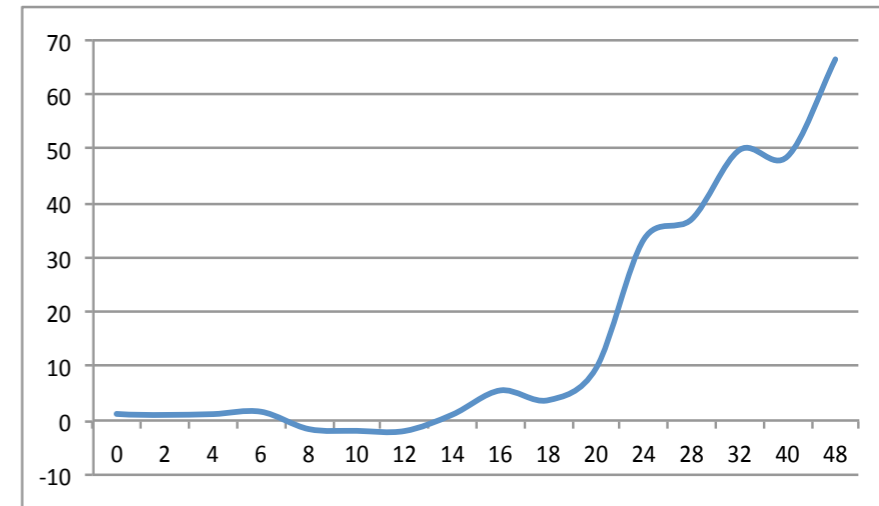

*Nvsfrp1/5-like* Cp\_0hpf: 27.51

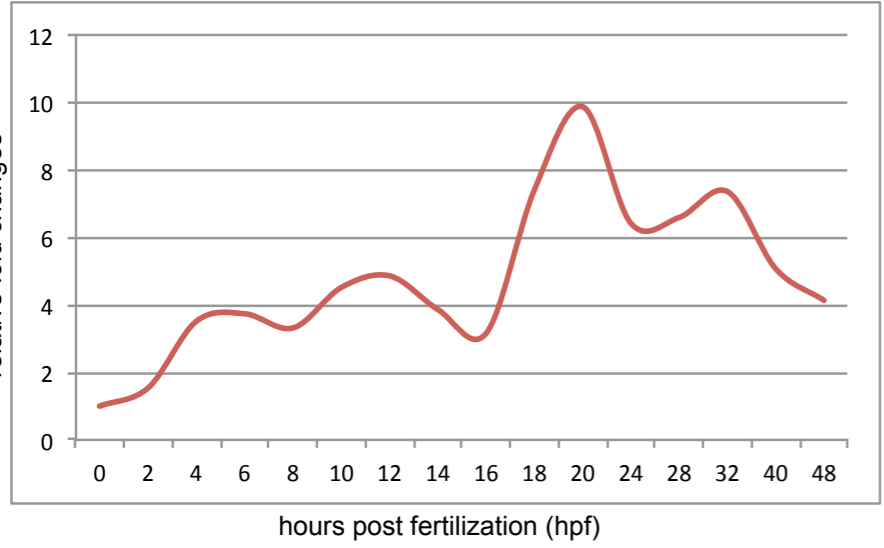

*Nvdkk124* Cp\_0hpf: 40.00

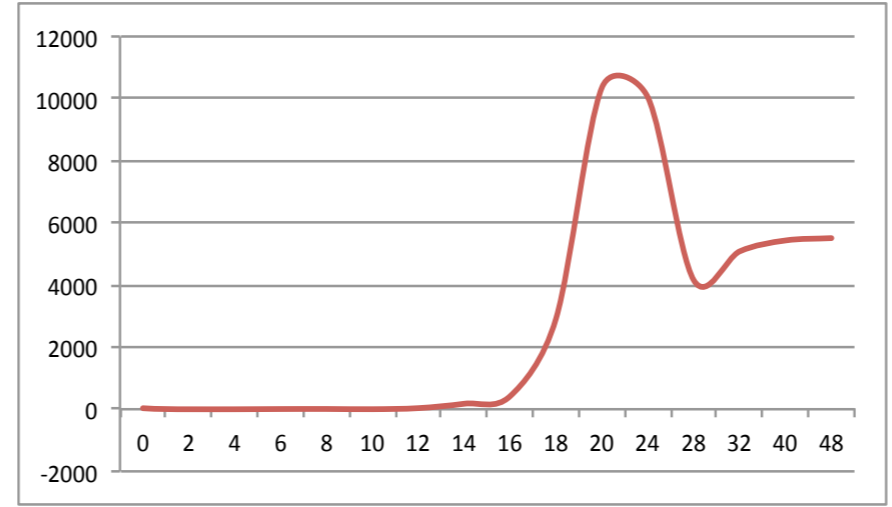

*Nvhd146* Cp\_0hpf: 37.67

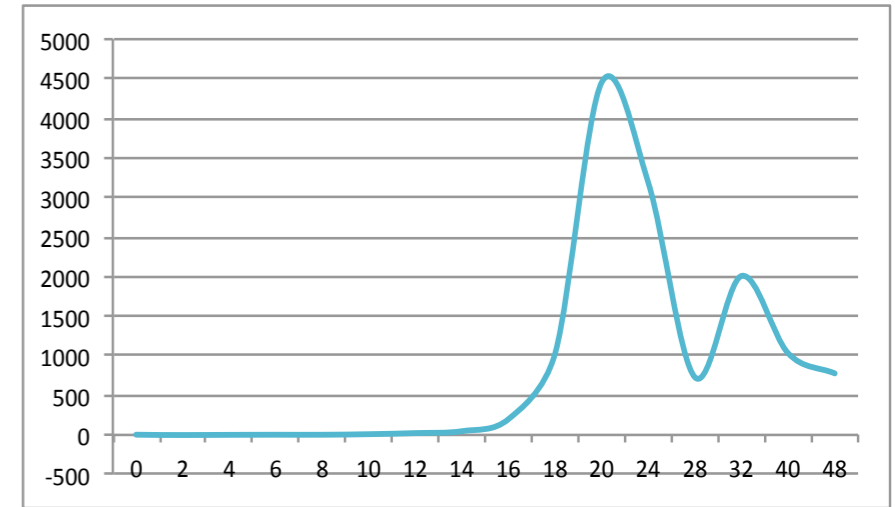

*Nvsix3/6* Cp\_0hpf: 33.64

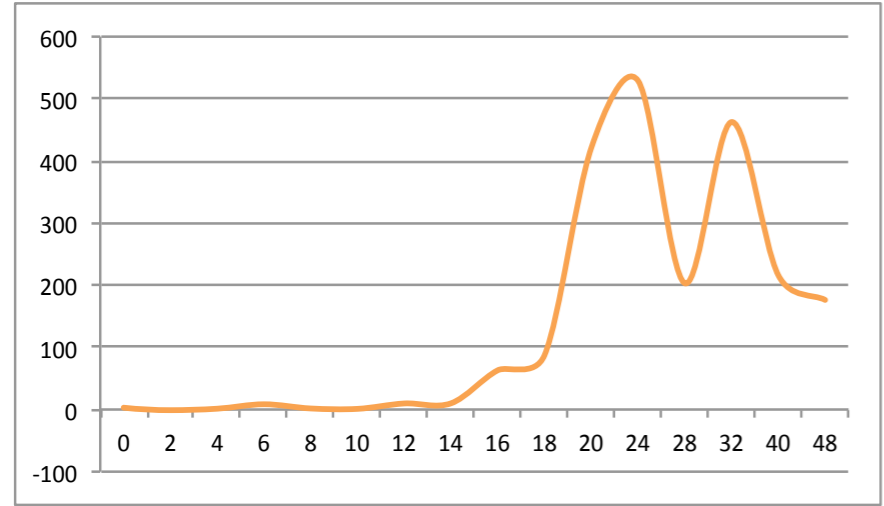

*Nvc-myc-like* Cp\_0hpf: 40.00

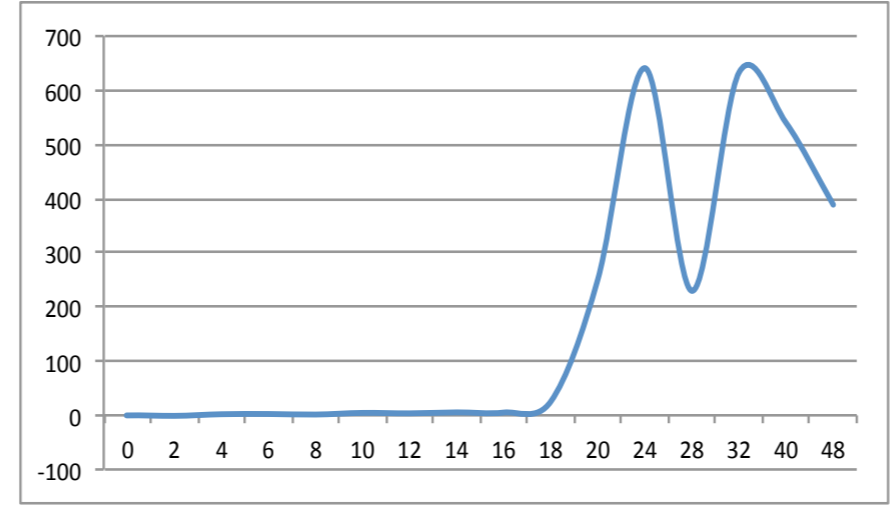

*Nvtolloid-like* Cp\_0hpf: 38.69

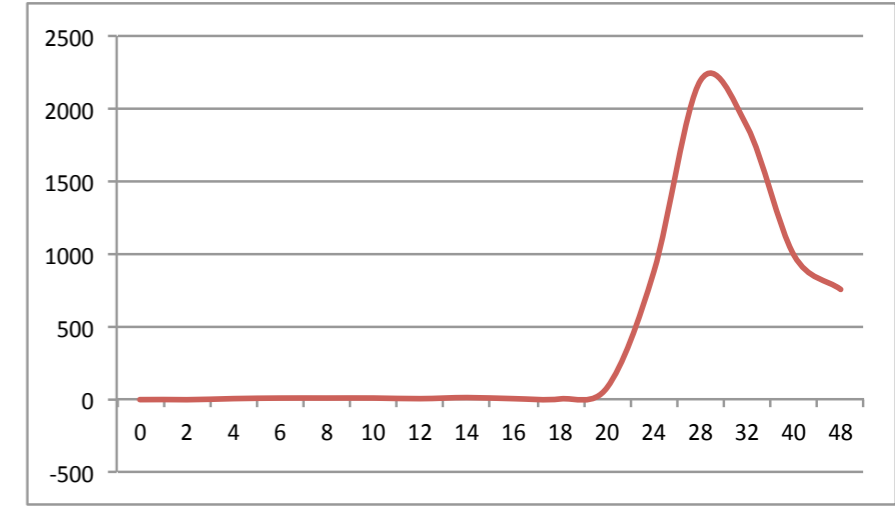

*NvfoxD1-like* Cp\_0hpf: 31.87

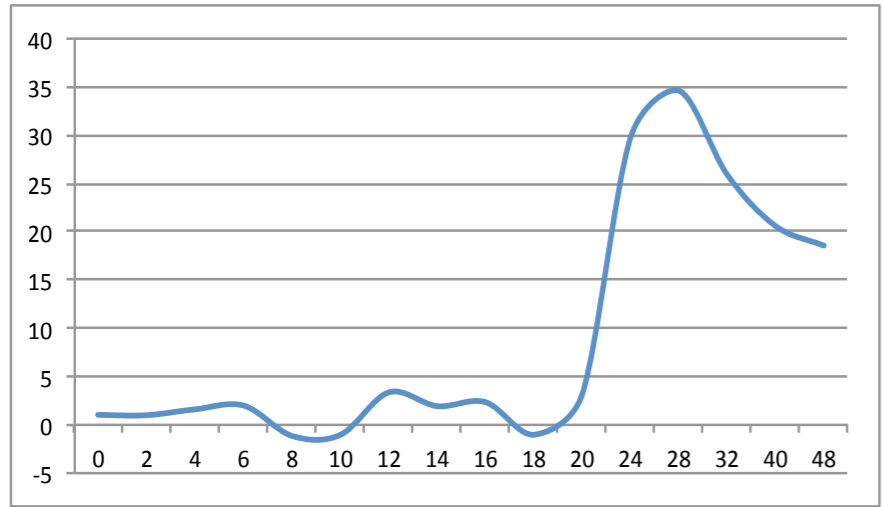

*Nvwnt7b* Cp\_0hpf: 40.00

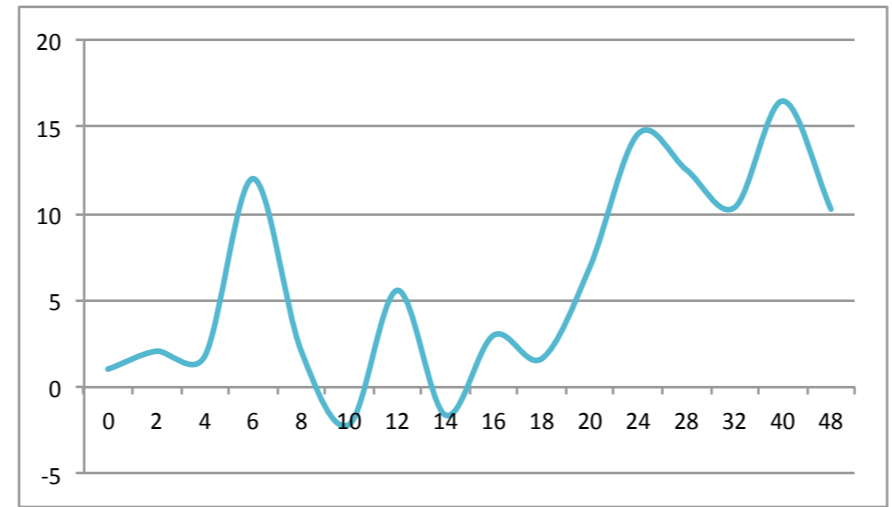

Supplement: NIHMS903915-supplement-4.pdf [file NIHMS903915-supplement-4.pdf]
